# Supplementary material for: Accumulation and Biotransformation of Dinophysis Toxins by the Surf Clam Mesodesma donacium
Source: Toxins (Basel). 2018 Aug 4;10(8):314. doi: 10.3390/toxins10080314 (PMC6115731; doi:10.3390/toxins10080314)
Supplement: Supplementary file 1 [file toxins-10-00314-s001.zip › CellCountsDinophysisCoquimbo_2009_2010.xlsx]

## Sheet: ESPECIES IMPORTANTES  DATA
	C2
fecha	C2_0-5m	C2_5-10m
2009-04-01	600
2009-04-09	600	200
2009-04-17	1000	800
2009-04-22	600	400
2009-04-29		200
2009-05-06		100
2009-05-08	200	100
2009-05-15		200
2009-05-18	100
2009-05-20	200	100
2009-05-25		200
2009-05-27	100	100
2009-05-29		200
2009-06-03
2009-06-05	300	100
2009-06-12	200	200
2009-06-17		100
2009-06-24	300	200
2009-07-03	500	200
2009-07-08	400	300
2009-07-15	300
2009-07-22
2009-07-31	200	200
2009-08-06	800	300
2009-08-14	200	200
2009-08-26	400	300
2009-09-02	200	200
2009-09-11
2009-09-16	200	600
2009-09-23	400
2009-09-30		200
2009-10-07
2009-10-21	200	100
2009-10-28
2009-11-06		300
2009-11-13	400	200
2009-11-18
2009-11-25
2009-12-04
2009-12-09		400
2009-12-18
2009-12-22		300
2009-12-30		100
2010-01-06		100
2010-01-20
2010-01-29	1200	1000
2010-02-03
2010-02-12	1000	2100
2010-02-17	3200	1000
2010-03-03	800	400
2010-03-10	100	100
2010-03-17
2010-03-26
2010-03-30
2010-04-09
2010-04-14	300	300
2010-04-23
2010-04-28
