# Supplementary material for: Accumulation and Biotransformation of Dinophysis Toxins by the Surf Clam Mesodesma donacium
Source: Toxins (Basel). 2018 Aug 4;10(8):314. doi: 10.3390/toxins10080314 (PMC6115731; doi:10.3390/toxins10080314)
Supplement: Supplementary file 1 [file toxins-10-00314-s001.zip › PTXsConcentrationsInExtracts.xls]

## Sheet: OA
Component Name		Curve Index	Weighting Index	Origin Index	Equation
OA					N/A
							Specified	Calculated
Filename	Sample Type	Sample Name	Integ. Type	Area	ISTD Area	Area	Amount	Amount	%Diff	%RSD-AMT	Peak Status	Level	Units	RT	Sample ID
MIxLipoAgo14Nivel2_A	Std Bracket Sample		Method Settings	NF	NA	NF	6.67	NF	NF	NF	Not Found	std2	ng/mL	NF	1
MIxLipoAgo14Nivel2_B	Std Bracket Sample		Method Settings	NF	NA	NF	6.67	NF	NF	NF	Not Found	std2	ng/mL	NF	1
MIxLipoAgo14Nivel2_C	Std Bracket Sample		Method Settings	NF	NA	NF	6.67	NF	NF	NF	Not Found	std2	ng/mL	NF	1
MIxLipoAgo14Nivel3_A	Std Bracket Sample		Method Settings	NF	NA	NF	2.22	NF	NF	NF	Not Found	std3	ng/mL	NF	1
MIxLipoAgo14Nivel3_B	Std Bracket Sample		Method Settings	NF	NA	NF	2.22	NF	NF	NF	Not Found	std3	ng/mL	NF	1
MIxLipoAgo14Nivel3_C	Std Bracket Sample		Method Settings	NF	NA	NF	2.22	NF	NF	NF	Not Found	std3	ng/mL	NF	1
MIxLipoAgo14Nivel5_A	Std Bracket Sample		Method Settings	NF	NA	NF	0.25	NF	NF	NF	Not Found	std5	ng/mL	NF	1
MIxLipoAgo14Nivel5_B	Std Bracket Sample		Method Settings	NF	NA	NF	0.25	NF	NF	NF	Not Found	std5	ng/mL	NF	1
MIxLipoAgo14Nivel5_C	Std Bracket Sample		Method Settings	NF	NA	NF	0.25	NF	NF	NF	Not Found	std5	ng/mL	NF	1
GDMachaG1_010509_A	Unknown Sample		Method Settings	NF	NA	NF	NA	NF	NF	NF	Not Found	NA	ng/mL	NF	1
GDMachaG1_020909_A	Unknown Sample		Method Settings	NF	NA	NF	NA	NF	NF	NF	Not Found	NA	ng/mL	NF	1
GDMachaG1_030709_A	Unknown Sample		Method Settings	NF	NA	NF	NA	NF	NF	NF	Not Found	NA	ng/mL	NF	1
GDMachaG1_050509_A	Unknown Sample		Method Settings	NF	NA	NF	NA	NF	NF	NF	Not Found	NA	ng/mL	NF	1
GDMachaG1_050609_A	Unknown Sample		Method Settings	NF	NA	NF	NA	NF	NF	NF	Not Found	NA	ng/mL	NF	1
GDMachaG1_070110_A	Unknown Sample		Method Settings	NF	NA	NF	NA	NF	NF	NF	Not Found	NA	ng/mL	NF	1
GDMachaG1_070809_A	Unknown Sample		Method Settings	NF	NA	NF	NA	NF	NF	NF	Not Found	NA	ng/mL	NF	1
GDMachaG1_080709_A	Unknown Sample		Method Settings	NF	NA	NF	NA	NF	NF	NF	Not Found	NA	ng/mL	NF	1
GDMachaG1_110909_A	Unknown Sample		Method Settings	NF	NA	NF	NA	NF	NF	NF	Not Found	NA	ng/mL	NF	1
GDMachaG1_120210_A	Unknown Sample		Method Settings	NF	NA	NF	NA	NF	NF	NF	Not Found	NA	ng/mL	NF	1
GDMachaG1_120609_A	Unknown Sample		Method Settings	NF	NA	NF	NA	NF	NF	NF	Not Found	NA	ng/mL	NF	1
GDMachaG1_120809_A	Unknown Sample		Method Settings	NF	NA	NF	NA	NF	NF	NF	Not Found	NA	ng/mL	NF	1
GDMachaG1_130509_A	Unknown Sample		Method Settings	NF	NA	NF	NA	NF	NF	NF	Not Found	NA	ng/mL	NF	1
GDMachaG1_150709_A	Unknown Sample		Method Settings	NF	NA	NF	NA	NF	NF	NF	Not Found	NA	ng/mL	NF	1
GDMachaG1_160909_A	Unknown Sample		Method Settings	NF	NA	NF	NA	NF	NF	NF	Not Found	NA	ng/mL	NF	1
GDMachaG1_170310_A	Unknown Sample		Method Settings	NF	NA	NF	NA	NF	NF	NF	Not Found	NA	ng/mL	NF	1
GDMachaG1_170609_A	Unknown Sample		Method Settings	NF	NA	NF	NA	NF	NF	NF	Not Found	NA	ng/mL	NF	1
GDMachaG1_181109_A	Unknown Sample		Method Settings	NF	NA	NF	NA	NF	NF	NF	Not Found	NA	ng/mL	NF	1
GDMachaG1_190509_A	Unknown Sample		Method Settings	NF	NA	NF	NA	NF	NF	NF	Not Found	NA	ng/mL	NF	1
GDMachaG1_200110_A	Unknown Sample		Method Settings	NF	NA	NF	NA	NF	NF	NF	Not Found	NA	ng/mL	NF	1
GDMachaG1_200509_A	Unknown Sample		Method Settings	NF	NA	NF	NA	NF	NF	NF	Not Found	NA	ng/mL	NF	1
GDMachaG1_240609_A	Unknown Sample		Method Settings	NF	NA	NF	NA	NF	NF	NF	Not Found	NA	ng/mL	NF	1
GDMachaG1_240809_A	Unknown Sample		Method Settings	NF	NA	NF	NA	NF	NF	NF	Not Found	NA	ng/mL	NF	1
GDMachaG1_260509_A	Unknown Sample		Method Settings	NF	NA	NF	NA	NF	NF	NF	Not Found	NA	ng/mL	NF	1
GDMachaG1_260809_A	Unknown Sample		Method Settings	NF	NA	NF	NA	NF	NF	NF	Not Found	NA	ng/mL	NF	1
GDMachaG1_280809_A	Unknown Sample		Method Settings	NF	NA	NF	NA	NF	NF	NF	Not Found	NA	ng/mL	NF	1
GDMachaG1_290609_A	Unknown Sample		Method Settings	NF	NA	NF	NA	NF	NF	NF	Not Found	NA	ng/mL	NF	1
GDMachaG1_310709_A	Unknown Sample		Method Settings	NF	NA	NF	NA	NF	NF	NF	Not Found	NA	ng/mL	NF	1
GDMachaG1_310809_A	Unknown Sample		Method Settings	NF	NA	NF	NA	NF	NF	NF	Not Found	NA	ng/mL	NF	1
GDMachaG2_010509_A	Unknown Sample		Method Settings	NF	NA	NF	NA	NF	NF	NF	Not Found	NA	ng/mL	NF	1
GDMachaG2_020909_A	Unknown Sample		Method Settings	NF	NA	NF	NA	NF	NF	NF	Not Found	NA	ng/mL	NF	1
GDMachaG2_030709_A	Unknown Sample		Method Settings	NF	NA	NF	NA	NF	NF	NF	Not Found	NA	ng/mL	NF	1
GDMachaG2_050509_A	Unknown Sample		Method Settings	NF	NA	NF	NA	NF	NF	NF	Not Found	NA	ng/mL	NF	1
GDMachaG2_050609_A	Unknown Sample		Method Settings	NF	NA	NF	NA	NF	NF	NF	Not Found	NA	ng/mL	NF	1
GDMachaG2_070110_A	Unknown Sample		Method Settings	NF	NA	NF	NA	NF	NF	NF	Not Found	NA	ng/mL	NF	1
GDMachaG2_070809_A	Unknown Sample		Method Settings	NF	NA	NF	NA	NF	NF	NF	Not Found	NA	ng/mL	NF	1
GDMachaG2_080709_A	Unknown Sample		Method Settings	NF	NA	NF	NA	NF	NF	NF	Not Found	NA	ng/mL	NF	1
GDMachaG2_110909_A	Unknown Sample		Method Settings	NF	NA	NF	NA	NF	NF	NF	Not Found	NA	ng/mL	NF	1
GDMachaG2_120210_A	Unknown Sample		Method Settings	NF	NA	NF	NA	NF	NF	NF	Not Found	NA	ng/mL	NF	1
GDMachaG2_120609_A	Unknown Sample		Method Settings	NF	NA	NF	NA	NF	NF	NF	Not Found	NA	ng/mL	NF	1
GDMachaG2_120809_A	Unknown Sample		Method Settings	NF	NA	NF	NA	NF	NF	NF	Not Found	NA	ng/mL	NF	1
GDMachaG2_130509_A	Unknown Sample		Method Settings	NF	NA	NF	NA	NF	NF	NF	Not Found	NA	ng/mL	NF	1
GDMachaG2_160909_A	Unknown Sample		Method Settings	NF	NA	NF	NA	NF	NF	NF	Not Found	NA	ng/mL	NF	1
GDMachaG2_170310_A	Unknown Sample		Method Settings	NF	NA	NF	NA	NF	NF	NF	Not Found	NA	ng/mL	NF	1
GDMachaG2_170609_A	Unknown Sample		Method Settings	NF	NA	NF	NA	NF	NF	NF	Not Found	NA	ng/mL	NF	1
GDMachaG2_181109_A	Unknown Sample		Method Settings	NF	NA	NF	NA	NF	NF	NF	Not Found	NA	ng/mL	NF	1
GDMachaG2_190509_A	Unknown Sample		Method Settings	NF	NA	NF	NA	NF	NF	NF	Not Found	NA	ng/mL	NF	1
GDMachaG2_200110_A	Unknown Sample		Method Settings	NF	NA	NF	NA	NF	NF	NF	Not Found	NA	ng/mL	NF	1
GDMachaG2_200509_A	Unknown Sample		Method Settings	NF	NA	NF	NA	NF	NF	NF	Not Found	NA	ng/mL	NF	1
GDMachaG2_240609_A	Unknown Sample		Method Settings	NF	NA	NF	NA	NF	NF	NF	Not Found	NA	ng/mL	NF	1
GDMachaG2_240809_A	Unknown Sample		Method Settings	NF	NA	NF	NA	NF	NF	NF	Not Found	NA	ng/mL	NF	1
GDMachaG2_260509_A	Unknown Sample		Method Settings	NF	NA	NF	NA	NF	NF	NF	Not Found	NA	ng/mL	NF	1
GDMachaG2_260809_A	Unknown Sample		Method Settings	NF	NA	NF	NA	NF	NF	NF	Not Found	NA	ng/mL	NF	1
GDMachaG2_280809_A	Unknown Sample		Method Settings	NF	NA	NF	NA	NF	NF	NF	Not Found	NA	ng/mL	NF	1
GDMachaG2_290609_A	Unknown Sample		Method Settings	NF	NA	NF	NA	NF	NF	NF	Not Found	NA	ng/mL	NF	1
GDMachaG2_310709_A	Unknown Sample		Method Settings	NF	NA	NF	NA	NF	NF	NF	Not Found	NA	ng/mL	NF	1
GDMachaG2_310809_A	Unknown Sample		Method Settings	NF	NA	NF	NA	NF	NF	NF	Not Found	NA	ng/mL	NF	1
GDMachaG3_010509_A	Unknown Sample		Method Settings	NF	NA	NF	NA	NF	NF	NF	Not Found	NA	ng/mL	NF	1
GDMachaG3_020909_A	Unknown Sample		Method Settings	NF	NA	NF	NA	NF	NF	NF	Not Found	NA	ng/mL	NF	1
GDMachaG3_030709_A	Unknown Sample		Method Settings	NF	NA	NF	NA	NF	NF	NF	Not Found	NA	ng/mL	NF	1
GDMachaG3_050509_A	Unknown Sample		Method Settings	NF	NA	NF	NA	NF	NF	NF	Not Found	NA	ng/mL	NF	1
GDMachaG3_050609_A	Unknown Sample		Method Settings	NF	NA	NF	NA	NF	NF	NF	Not Found	NA	ng/mL	NF	1
GDMachaG3_070110_A	Unknown Sample		Method Settings	NF	NA	NF	NA	NF	NF	NF	Not Found	NA	ng/mL	NF	1
GDMachaG3_070809_A	Unknown Sample		Method Settings	NF	NA	NF	NA	NF	NF	NF	Not Found	NA	ng/mL	NF	1
GDMachaG3_080709_A	Unknown Sample		Method Settings	NF	NA	NF	NA	NF	NF	NF	Not Found	NA	ng/mL	NF	1
GDMachaG3_110909_A	Unknown Sample		Method Settings	NF	NA	NF	NA	NF	NF	NF	Not Found	NA	ng/mL	NF	1
GDMachaG3_120210_A	Unknown Sample		Method Settings	NF	NA	NF	NA	NF	NF	NF	Not Found	NA	ng/mL	NF	1
GDMachaG3_120609_A	Unknown Sample		Method Settings	NF	NA	NF	NA	NF	NF	NF	Not Found	NA	ng/mL	NF	1
GDMachaG3_120809_A	Unknown Sample		Method Settings	NF	NA	NF	NA	NF	NF	NF	Not Found	NA	ng/mL	NF	1
GDMachaG3_130509_A	Unknown Sample		Method Settings	NF	NA	NF	NA	NF	NF	NF	Not Found	NA	ng/mL	NF	1
GDMachaG3_160909_A	Unknown Sample		Method Settings	NF	NA	NF	NA	NF	NF	NF	Not Found	NA	ng/mL	NF	1
GDMachaG3_170310_A	Unknown Sample		Method Settings	NF	NA	NF	NA	NF	NF	NF	Not Found	NA	ng/mL	NF	1
GDMachaG3_170609_A	Unknown Sample		Method Settings	NF	NA	NF	NA	NF	NF	NF	Not Found	NA	ng/mL	NF	1
GDMachaG3_181109_A	Unknown Sample		Method Settings	NF	NA	NF	NA	NF	NF	NF	Not Found	NA	ng/mL	NF	1
GDMachaG3_190509_A	Unknown Sample		Method Settings	NF	NA	NF	NA	NF	NF	NF	Not Found	NA	ng/mL	NF	1
GDMachaG3_200110_A	Unknown Sample		Method Settings	NF	NA	NF	NA	NF	NF	NF	Not Found	NA	ng/mL	NF	1
GDMachaG3_200509_A	Unknown Sample		Method Settings	NF	NA	NF	NA	NF	NF	NF	Not Found	NA	ng/mL	NF	1
GDMachaG3_220709_A	Unknown Sample		Method Settings	NF	NA	NF	NA	NF	NF	NF	Not Found	NA	ng/mL	NF	1
GDMachaG3_240609_A	Unknown Sample		Method Settings	NF	NA	NF	NA	NF	NF	NF	Not Found	NA	ng/mL	NF	1
GDMachaG3_240809_A	Unknown Sample		Method Settings	NF	NA	NF	NA	NF	NF	NF	Not Found	NA	ng/mL	NF	1
GDMachaG3_260509_A	Unknown Sample		Method Settings	NF	NA	NF	NA	NF	NF	NF	Not Found	NA	ng/mL	NF	1
GDMachaG3_260809_A	Unknown Sample		Method Settings	NF	NA	NF	NA	NF	NF	NF	Not Found	NA	ng/mL	NF	1
GDMachaG3_280809_A	Unknown Sample		Method Settings	NF	NA	NF	NA	NF	NF	NF	Not Found	NA	ng/mL	NF	1
GDMachaG3_290609_A	Unknown Sample		Method Settings	NF	NA	NF	NA	NF	NF	NF	Not Found	NA	ng/mL	NF	1
GDMachaG3_310709_A	Unknown Sample		Method Settings	NF	NA	NF	NA	NF	NF	NF	Not Found	NA	ng/mL	NF	1
GDMachaG3_310809_A	Unknown Sample		Method Settings	NF	NA	NF	NA	NF	NF	NF	Not Found	NA	ng/mL	NF	1
GDMachaG1_090410	Unknown Sample		User Settings	NF	NA	NF	NA	NF	NF	NF	Not Found	NA	ng/mL	NF	1
GDMachaG1_200310	Unknown Sample		User Settings	NF	NA	NF	NA	NF	NF	NF	Not Found	NA	ng/mL	NF	1
GDMachaG1_240410	Unknown Sample		User Settings	NF	NA	NF	NA	NF	NF	NF	Not Found	NA	ng/mL	NF	1
GDMachaG1_280410	Unknown Sample		User Settings	NF	NA	NF	NA	NF	NF	NF	Not Found	NA	ng/mL	NF	1
GDMachaG1_310310	Unknown Sample		User Settings	NF	NA	NF	NA	NF	NF	NF	Not Found	NA	ng/mL	NF	1
GDMachaG2_090410	Unknown Sample		User Settings	NF	NA	NF	NA	NF	NF	NF	Not Found	NA	ng/mL	NF	1
GDMachaG2_200310	Unknown Sample		User Settings	NF	NA	NF	NA	NF	NF	NF	Not Found	NA	ng/mL	NF	1
GDMachaG2_240410	Unknown Sample		User Settings	NF	NA	NF	NA	NF	NF	NF	Not Found	NA	ng/mL	NF	1
GDMachaG2_280410	Unknown Sample		User Settings	NF	NA	NF	NA	NF	NF	NF	Not Found	NA	ng/mL	NF	1
GDMachaG2_310310	Unknown Sample		User Settings	NF	NA	NF	NA	NF	NF	NF	Not Found	NA	ng/mL	NF	1
GDMachaG3_090410	Unknown Sample		User Settings	NF	NA	NF	NA	NF	NF	NF	Not Found	NA	ng/mL	NF	1
GDMachaG3_200310	Unknown Sample		User Settings	NF	NA	NF	NA	NF	NF	NF	Not Found	NA	ng/mL	NF	1
GDMachaG3_240410	Unknown Sample		User Settings	NF	NA	NF	NA	NF	NF	NF	Not Found	NA	ng/mL	NF	1
GDMachaG3_280410	Unknown Sample		User Settings	NF	NA	NF	NA	NF	NF	NF	Not Found	NA	ng/mL	NF	1
GDMachaG3_310310	Unknown Sample		User Settings	NF	NA	NF	NA	NF	NF	NF	Not Found	NA	ng/mL	NF	1

## Sheet: PTX2sa
Component Name
PTX2sa	ng/mL
	Calculated
Filename	Amount
GDMachaG1_010509_A	20.3757
GDMachaG1_020909_A	1.15638
GDMachaG1_030709_A	13.0225
GDMachaG1_050509_A	4.55163
GDMachaG1_050609_A	4.2867
GDMachaG1_070110_A	1.35161
GDMachaG1_070809_A	4.97688
GDMachaG1_080709_A	21.5856
GDMachaG1_110909_A	3.53417
GDMachaG1_120210_A	8.17285
GDMachaG1_120609_A	2.38786
GDMachaG1_120809_A	50.7466
GDMachaG1_130509_A	98.7459
GDMachaG1_150709_A	15.4036
GDMachaG1_160909_A	3.39251
GDMachaG1_170310_A	20.8175
GDMachaG1_170609_A	5.29749
GDMachaG1_181109_A	0.345781
GDMachaG1_190509_A	24.1204
GDMachaG1_200110_A	4.9457
GDMachaG1_200509_A	7.78375
GDMachaG1_240609_A	8.75021
GDMachaG1_240809_A	3.86747
GDMachaG1_260509_A	2.2103
GDMachaG1_260809_A	2.80408
GDMachaG1_280809_A	0.305489
GDMachaG1_290609_A	2.71475
GDMachaG1_310709_A	11.2296
GDMachaG1_310809_A	2.82861
GDMachaG2_010509_A	11.895
GDMachaG2_020909_A	1.53275
GDMachaG2_030709_A	8.81678
GDMachaG2_050509_A	1.88197
GDMachaG2_050609_A	0.981478
GDMachaG2_070110_A	0.709088
GDMachaG2_070809_A	4.90416
GDMachaG2_080709_A	20.9147
GDMachaG2_110909_A	6.88156
GDMachaG2_120210_A	3.9092
GDMachaG2_120609_A	1.44228
GDMachaG2_120809_A	143.696
GDMachaG2_130509_A	122.32
GDMachaG2_160909_A	6.0615
GDMachaG2_170310_A	11.5033
GDMachaG2_170609_A	5.13284
GDMachaG2_181109_A	1.65977
GDMachaG2_190509_A	91.288
GDMachaG2_200110_A	4.27249
GDMachaG2_200509_A	6.16479
GDMachaG2_240609_A	14.1207
GDMachaG2_240809_A	4.83522
GDMachaG2_260509_A	0.768655
GDMachaG2_260809_A	0.900697
GDMachaG2_280809_A	0.223893
GDMachaG2_290609_A	1.42597
GDMachaG2_310709_A	19.5044
GDMachaG2_310809_A	4.16964
GDMachaG3_010509_A	8.85918
GDMachaG3_020909_A	0.790469
GDMachaG3_030709_A	14.3961
GDMachaG3_050509_A	2.46225
GDMachaG3_050609_A	2.87005
GDMachaG3_070110_A	1.74834
GDMachaG3_070809_A	4.12615
GDMachaG3_080709_A	30.9985
GDMachaG3_110909_A	5.79691
GDMachaG3_120210_A	4.57233
GDMachaG3_120609_A	2.60268
GDMachaG3_120809_A	95.1822
GDMachaG3_130509_A	83.3657
GDMachaG3_160909_A	4.89258
GDMachaG3_170310_A	20.1617
GDMachaG3_170609_A	3.285
GDMachaG3_181109_A	0.326784
GDMachaG3_190509_A	20.0138
GDMachaG3_200110_A	1.25825
GDMachaG3_200509_A	4.17111
GDMachaG3_220709_A	6.15491
GDMachaG3_240609_A	5.47101
GDMachaG3_240809_A	9.0236
GDMachaG3_260509_A	1.78274
GDMachaG3_260809_A	3.77159
GDMachaG3_280809_A	1.41226
GDMachaG3_290609_A	5.02091
GDMachaG3_310709_A	16.086
GDMachaG3_310809_A	10.3616
GDMachaG1_090410	13.8794
GDMachaG1_200310	34.6739
GDMachaG1_240410	6.01013
GDMachaG1_280410	2.35368
GDMachaG1_310310	7.51686
GDMachaG2_090410	8.88818
GDMachaG2_200310	9.67644
GDMachaG2_240410	7.59836
GDMachaG2_280410	1.06007
GDMachaG2_310310	12.1127
GDMachaG3_090410	25.9236
GDMachaG3_200310	12.7719
GDMachaG3_240410	7.60506
GDMachaG3_280410	2.15971
GDMachaG3_310310	23.9947

## Sheet: ptx2sa-C_16-c33,37
Component Name
ptx2sa-C:16-c33,37	ng/mL
	Calculated
Filename	Amount
GDMachaG1_010509_A	3.0931
GDMachaG1_020909_A	2.17439
GDMachaG1_030709_A	3.06056
GDMachaG1_050509_A	1.2462
GDMachaG1_050609_A	1.44839
GDMachaG1_070110_A	0.054799
GDMachaG1_070809_A	0.358622
GDMachaG1_080709_A	3.17468
GDMachaG1_110909_A	1.31132
GDMachaG1_120210_A	5.37194
GDMachaG1_120609_A	0.350412
GDMachaG1_120809_A	63.8186
GDMachaG1_130509_A	16.2951
GDMachaG1_150709_A	5.13454
GDMachaG1_160909_A	1.80118
GDMachaG1_170310_A	23.7699
GDMachaG1_170609_A	1.44974
GDMachaG1_181109_A	0.461105
GDMachaG1_190509_A	7.90718
GDMachaG1_200110_A	2.96476
GDMachaG1_200509_A	0.915236
GDMachaG1_240609_A	1.83598
GDMachaG1_240809_A	2.98967
GDMachaG1_260509_A	3.12915
GDMachaG1_260809_A	5.20649
GDMachaG1_280809_A	0.199926
GDMachaG1_290609_A	1.14543
GDMachaG1_310709_A	3.38975
GDMachaG1_310809_A	0.558647
GDMachaG2_010509_A	4.90695
GDMachaG2_020909_A	1.08866
GDMachaG2_030709_A	3.32516
GDMachaG2_050509_A	1.90774
GDMachaG2_050609_A	0.599025
GDMachaG2_070110_A	0.329994
GDMachaG2_070809_A	1.59254
GDMachaG2_080709_A	2.67754
GDMachaG2_110909_A	2.4446
GDMachaG2_120210_A	7.90153
GDMachaG2_120609_A	0.943967
GDMachaG2_120809_A	122.192
GDMachaG2_130509_A	23.8171
GDMachaG2_160909_A	1.11123
GDMachaG2_170310_A	12.0948
GDMachaG2_170609_A	1.70802
GDMachaG2_181109_A	NF
GDMachaG2_190509_A	11.1964
GDMachaG2_200110_A	1.20912
GDMachaG2_200509_A	1.73034
GDMachaG2_240609_A	2.47824
GDMachaG2_240809_A	1.84508
GDMachaG2_260509_A	1.67989
GDMachaG2_260809_A	3.10602
GDMachaG2_280809_A	0.330208
GDMachaG2_290609_A	1.59143
GDMachaG2_310709_A	5.07005
GDMachaG2_310809_A	0.375832
GDMachaG3_010509_A	1.81914
GDMachaG3_020909_A	1.8351
GDMachaG3_030709_A	3.19297
GDMachaG3_050509_A	2.1366
GDMachaG3_050609_A	1.29708
GDMachaG3_070110_A	0.44361
GDMachaG3_070809_A	2.35958
GDMachaG3_080709_A	2.59434
GDMachaG3_110909_A	1.08121
GDMachaG3_120210_A	3.08956
GDMachaG3_120609_A	1.71608
GDMachaG3_120809_A	82.3244
GDMachaG3_130509_A	18.0747
GDMachaG3_160909_A	1.79717
GDMachaG3_170310_A	21.9107
GDMachaG3_170609_A	1.77497
GDMachaG3_181109_A	0.808301
GDMachaG3_190509_A	8.8342
GDMachaG3_200110_A	1.45226
GDMachaG3_200509_A	1.04912
GDMachaG3_220709_A	5.49546
GDMachaG3_240609_A	1.84886
GDMachaG3_240809_A	2.45801
GDMachaG3_260509_A	2.24615
GDMachaG3_260809_A	2.83715
GDMachaG3_280809_A	0.114572
GDMachaG3_290609_A	1.40137
GDMachaG3_310709_A	2.43104
GDMachaG3_310809_A	0.97166
GDMachaG1_090410	8.33301
GDMachaG1_200310	23.9079
GDMachaG1_240410	12.4773
GDMachaG1_280410	9.42392
GDMachaG1_310310	18.1822
GDMachaG2_090410	5.87891
GDMachaG2_200310	30.8726
GDMachaG2_240410	8.69506
GDMachaG2_280410	6.90283
GDMachaG2_310310	12.624
GDMachaG3_090410	16.2447
GDMachaG3_200310	24.3382
GDMachaG3_240410	9.17269
GDMachaG3_280410	12.7831
GDMachaG3_310310	14.3692

## Sheet: ptx2sa-c_16_c11
Component Name
ptx2sa-c:16_c11	ng/mL
	Calculated
Filename	Amount
GDMachaG1_010509_A	7.16631
GDMachaG1_020909_A	5.01781
GDMachaG1_030709_A	7.44949
GDMachaG1_050509_A	3.27671
GDMachaG1_050609_A	3.86864
GDMachaG1_070110_A	0.670769
GDMachaG1_070809_A	1.22505
GDMachaG1_080709_A	8.84035
GDMachaG1_110909_A	4.06332
GDMachaG1_120210_A	15.0707
GDMachaG1_120609_A	1.92802
GDMachaG1_120809_A	179.053
GDMachaG1_130509_A	40.6922
GDMachaG1_150709_A	13.7037
GDMachaG1_160909_A	5.87202
GDMachaG1_170310_A	60.8438
GDMachaG1_170609_A	3.73534
GDMachaG1_181109_A	1.83909
GDMachaG1_190509_A	19.1792
GDMachaG1_200110_A	9.68306
GDMachaG1_200509_A	3.26605
GDMachaG1_240609_A	5.11167
GDMachaG1_240809_A	7.99165
GDMachaG1_260509_A	7.66081
GDMachaG1_260809_A	12.9523
GDMachaG1_280809_A	0.856312
GDMachaG1_290609_A	3.31721
GDMachaG1_310709_A	9.38761
GDMachaG1_310809_A	2.16428
GDMachaG2_010509_A	11.8858
GDMachaG2_020909_A	2.33036
GDMachaG2_030709_A	7.05945
GDMachaG2_050509_A	5.10681
GDMachaG2_050609_A	2.44027
GDMachaG2_070110_A	0.792606
GDMachaG2_070809_A	3.09832
GDMachaG2_080709_A	6.8706
GDMachaG2_110909_A	5.50819
GDMachaG2_120210_A	18.4685
GDMachaG2_120609_A	2.47994
GDMachaG2_120809_A	339.578
GDMachaG2_130509_A	61.0332
GDMachaG2_160909_A	4.8332
GDMachaG2_170310_A	31.2701
GDMachaG2_170609_A	4.25193
GDMachaG2_181109_A	0.101729
GDMachaG2_190509_A	30.5107
GDMachaG2_200110_A	3.9291
GDMachaG2_200509_A	4.5062
GDMachaG2_240609_A	5.08683
GDMachaG2_240809_A	4.62623
GDMachaG2_260509_A	4.24869
GDMachaG2_260809_A	6.74848
GDMachaG2_280809_A	1.55654
GDMachaG2_290609_A	5.39737
GDMachaG2_310709_A	10.8666
GDMachaG2_310809_A	1.24041
GDMachaG3_010509_A	4.30545
GDMachaG3_020909_A	4.24949
GDMachaG3_030709_A	8.17106
GDMachaG3_050509_A	4.08501
GDMachaG3_050609_A	4.34424
GDMachaG3_070110_A	1.75657
GDMachaG3_070809_A	6.04574
GDMachaG3_080709_A	7.19208
GDMachaG3_110909_A	3.78142
GDMachaG3_120210_A	9.44685
GDMachaG3_120609_A	3.38595
GDMachaG3_120809_A	227.916
GDMachaG3_130509_A	52.3002
GDMachaG3_160909_A	4.93677
GDMachaG3_170310_A	58.6671
GDMachaG3_170609_A	4.00603
GDMachaG3_181109_A	2.70761
GDMachaG3_190509_A	21.2851
GDMachaG3_200110_A	4.69369
GDMachaG3_200509_A	2.5897
GDMachaG3_220709_A	15.1806
GDMachaG3_240609_A	4.41175
GDMachaG3_240809_A	6.10912
GDMachaG3_260509_A	6.266
GDMachaG3_260809_A	6.45409
GDMachaG3_280809_A	0.559194
GDMachaG3_290609_A	3.60208
GDMachaG3_310709_A	6.61051
GDMachaG3_310809_A	2.33203
GDMachaG1_090410	22.5666
GDMachaG1_200310	67.6828
GDMachaG1_240410	33.9265
GDMachaG1_280410	27.3968
GDMachaG1_310310	48.9522
GDMachaG2_090410	12.4716
GDMachaG2_200310	82.6763
GDMachaG2_240410	28.3106
GDMachaG2_280410	21.0919
GDMachaG2_310310	35.2
GDMachaG3_090410	43.6899
GDMachaG3_200310	66.8167
GDMachaG3_240410	26.3378
GDMachaG3_280410	36.1365
GDMachaG3_310310	38.7522

## Sheet: PTX2
Component Name
PTX2	ng/mL
	Calculated
Filename	Amount
GDMachaG1_010509_A	2.81784
GDMachaG1_020909_A	NF
GDMachaG1_030709_A	2.24684
GDMachaG1_050509_A	0.703689
GDMachaG1_050609_A	1.15921
GDMachaG1_070110_A	0.0446419
GDMachaG1_070809_A	0.779344
GDMachaG1_080709_A	4.30251
GDMachaG1_110909_A	0.281684
GDMachaG1_120210_A	0.776678
GDMachaG1_120609_A	0.208513
GDMachaG1_120809_A	4.98214
GDMachaG1_130509_A	30.1327
GDMachaG1_150709_A	1.62254
GDMachaG1_160909_A	0.202962
GDMachaG1_170310_A	0.723448
GDMachaG1_170609_A	1.96193
GDMachaG1_181109_A	NF
GDMachaG1_190509_A	4.21767
GDMachaG1_200110_A	0.551079
GDMachaG1_200509_A	0.666048
GDMachaG1_240609_A	2.44726
GDMachaG1_240809_A	0.0995129
GDMachaG1_260509_A	0.432565
GDMachaG1_260809_A	0.619841
GDMachaG1_280809_A	0.0104084
GDMachaG1_290609_A	0.352762
GDMachaG1_310709_A	2.44454
GDMachaG1_310809_A	0.349543
GDMachaG2_010509_A	1.48621
GDMachaG2_020909_A	0.0717365
GDMachaG2_030709_A	1.89955
GDMachaG2_050509_A	0.231464
GDMachaG2_050609_A	0.138482
GDMachaG2_070110_A	0.0714713
GDMachaG2_070809_A	0.483989
GDMachaG2_080709_A	2.14615
GDMachaG2_110909_A	0.533047
GDMachaG2_120210_A	0.423766
GDMachaG2_120609_A	0.0695175
GDMachaG2_120809_A	22.1065
GDMachaG2_130509_A	34.2722
GDMachaG2_160909_A	0.60387
GDMachaG2_170310_A	0.384055
GDMachaG2_170609_A	0.942211
GDMachaG2_181109_A	0.312199
GDMachaG2_190509_A	16.7591
GDMachaG2_200110_A	1.084
GDMachaG2_200509_A	0.40698
GDMachaG2_240609_A	3.89393
GDMachaG2_240809_A	0.346403
GDMachaG2_260509_A	0.213738
GDMachaG2_260809_A	0.0761677
GDMachaG2_280809_A	0.00971731
GDMachaG2_290609_A	0.547154
GDMachaG2_310709_A	2.99374
GDMachaG2_310809_A	0.441846
GDMachaG3_010509_A	1.44493
GDMachaG3_020909_A	0.0675602
GDMachaG3_030709_A	2.95606
GDMachaG3_050509_A	0.361187
GDMachaG3_050609_A	0.94157
GDMachaG3_070110_A	0.15282
GDMachaG3_070809_A	0.467066
GDMachaG3_080709_A	5.23242
GDMachaG3_110909_A	0.625637
GDMachaG3_120210_A	0.773534
GDMachaG3_120609_A	0.430488
GDMachaG3_120809_A	10.4394
GDMachaG3_130509_A	21.8016
GDMachaG3_160909_A	0.452868
GDMachaG3_170310_A	0.735427
GDMachaG3_170609_A	0.944397
GDMachaG3_181109_A	0.0099082
GDMachaG3_190509_A	3.51269
GDMachaG3_200110_A	0.0116782
GDMachaG3_200509_A	0.350201
GDMachaG3_220709_A	0.996805
GDMachaG3_240609_A	2.05856
GDMachaG3_240809_A	0.616818
GDMachaG3_260509_A	0.273477
GDMachaG3_260809_A	1.25899
GDMachaG3_280809_A	0.231804
GDMachaG3_290609_A	1.07151
GDMachaG3_310709_A	3.62285
GDMachaG3_310809_A	0.978373
GDMachaG1_090410	4.57761
GDMachaG1_200310	5.48867
GDMachaG1_240410	0.692576
GDMachaG1_280410	0.233362
GDMachaG1_310310	1.75218
GDMachaG2_090410	2.38638
GDMachaG2_200310	0.813252
GDMachaG2_240410	0.781867
GDMachaG2_280410	0.275498
GDMachaG2_310310	3.58238
GDMachaG3_090410	6.55124
GDMachaG3_200310	4.35048
GDMachaG3_240410	0.618108
GDMachaG3_280410	0.183259
GDMachaG3_310310	7.44224

## Sheet: Component
Component Name		Curve Index	Weighting Index	Origin Index	Equation
							Specified	Calculated
Filename	Sample Type	Sample Name	Integ. Type	Area	ISTD Area	Area Ratio	Amount	Amount	%Diff	%RSD	Peak Status	Level	Units	RT	Sample ID	Excluded
