# Supplementary figures and images for: Accumulation and Biotransformation of Dinophysis Toxins by the Surf Clam Mesodesma donacium
Source: MDPI journal article supplement (doi:10.3390/toxins10080314), 2018-08-04

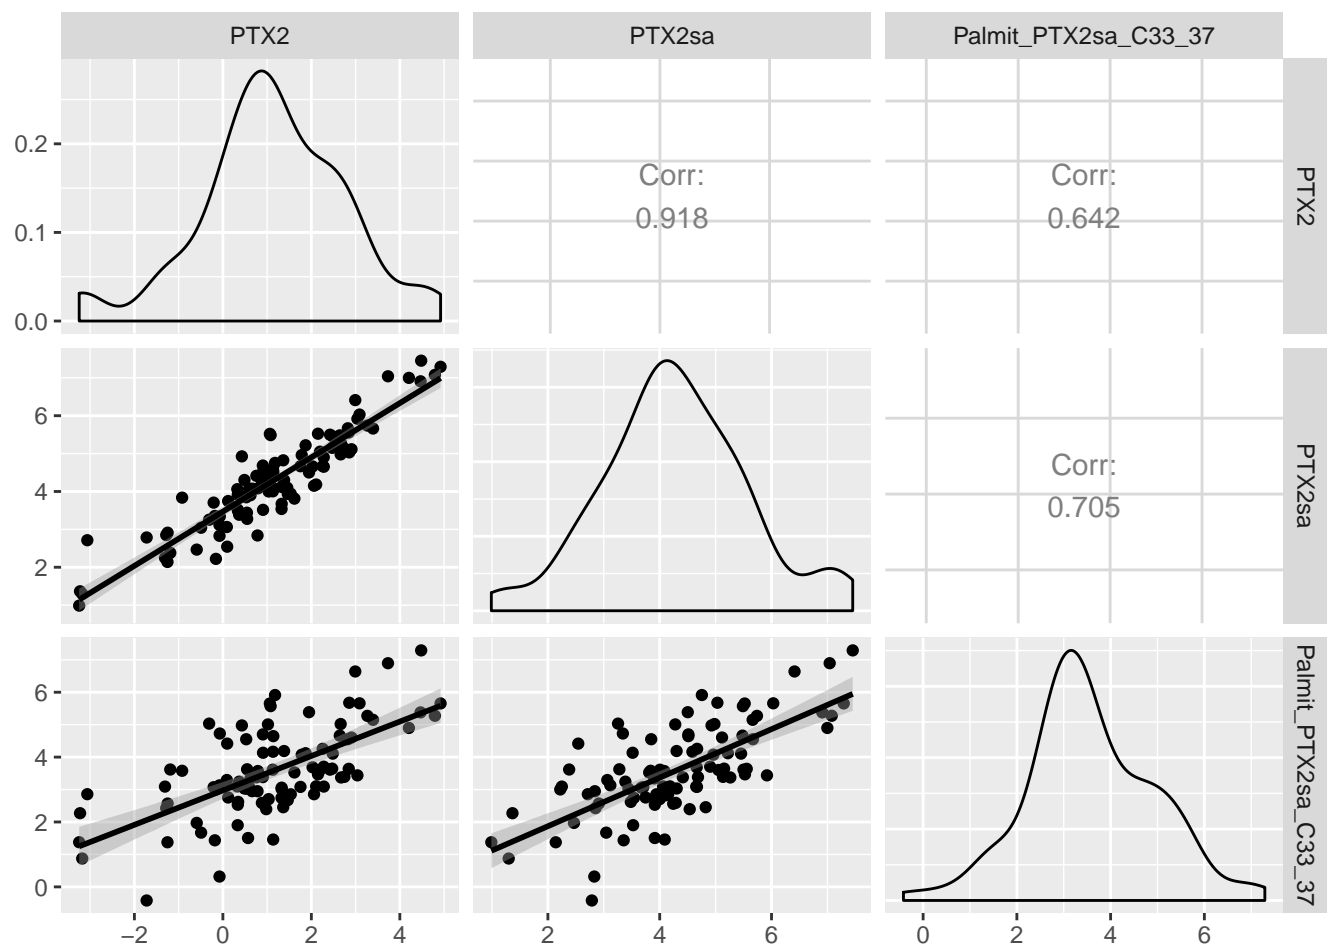

Supplement: s1 [file s1]
